1           **Systematic review of the validity of the hepatitis B virus**  
2           **detection tests in blood banks from 2000 to 2018.**

3  
4           **Claudia Patricia Orrego-Marín<sup>1</sup>, Jaiberth Antonio Cardona-Arias<sup>2</sup>, Sandra Medina-**  
5                           **Moreno<sup>3</sup>, Juan Carlos Zapata<sup>4\*</sup>**

6  
7           <sup>1</sup> School of Microbiology, University of Antioquia, Medellín, Colombia.

8           claudiorrego29@hotmail.com.

9           <sup>2</sup> School of Microbiology, University of Antioquia, Medellín, Colombia.

10          jaiberth.cardona@udea.edu.co

11          <sup>3</sup> Institute of Human Virology-School of Medicine, University of Maryland, Baltimore, MD

12          USA; smmoreno@ihv.umaryland.edu

13          <sup>4</sup> Institute of Human Virology-School of Medicine, University of Maryland, Baltimore, MD

14          USA; jczapata@ihv.umaryland.edu

15          \*Correspondence: jczapata@ihv.umaryland.edu (JCZ).

## 16 **Abstract**

17 **Background:** Hepatitis B Virus (HBV) is a public health problem that causes chronic hepatitis,  
18 eventually evolving to cirrhosis and hepatocellular carcinoma. Given the low frequency of  
19 screening in the general population, blood banks represent a key element for monitoring and  
20 controlling HBV transmission. The objective of this work was to evaluate the validity of the  
21 diagnosis of HBV in blood banks, based on studies published in the world scientific literature from  
22 2000 to 2018.

23 **Methods:** We used a Meta-analysis of random effects with application of a search and selection  
24 protocol according to Cochrane and PRISMA guidelines. Reproducibility, completeness and  
25 quality assessment were affirmed with QUADAS, a tool for assessing diagnostics. The parameters  
26 of sensitivity, specificity, likelihood ratios, odds ratio and ROC curve were analyzed in MetaDisc  
27 with 95% confidence.

28 **Results:** From 4,061 studies screened, only 12 complied with the protocol, and the compliant  
29 studies included a population of 17,391 healthy people and 1,229 infected. The compliant studies  
30 evaluated mainly immunodiagnosics (ELISA) using HB surface antigen (HBsAg) and less  
31 frequently anti-HBc (HB core antigen) and PCR. The tests for HBsAg presented sensitivity of  
32 94.1% (95% CI = 92.9% - 95.1%), specificity 98.2% (95% CI = 97.8% - 98.6%), diagnostic OR of  
33 1721 (95% CI = 607.18 - 4418.8) and Area Under the Curve of 99.7%.

34 **Conclusion:** With a large sample size and with the high quality of the studies evaluated in this  
35 review, we confirm that HBsAg for HBV immunodiagnosics has excellent validity, which  
36 supports its use in clinical screening, blood banks and population surveillance programs.

37 **Keywords:** Blood Bank, Hepatitis B, Surface Antigen, Meta-analysis; Immunological diagnosis.

## 38 **Introduction**

39 Hepatitis B virus (HBV) remains one of the main public health problems worldwide and an  
40 important cause for the development of chronic hepatitis, cirrhosis and hepatocellular carcinoma  
41 [1-3]. It is estimated that about two billion people are serologically positive for HBV [4] and  
42 according to data from the World Health Organization (WHO) in 2017, approximately 325 million  
43 people suffer from chronic infection [1]; This situation is aggravated if it is considered that diseases  
44 such as cirrhosis and carcinoma cost more than 650,000 lives each year [2].

45 HBV transmission occurs through blood transfusion, direct contact with blood, sexual intercourse  
46 and/or through intravenous injections [2,5-7]. WHO estimated that in 2001, unsafe blood  
47 transfusions generated 8-16 million HBV infections [6]. Although the current treatment and  
48 vaccination options are helping to decrease this burden, especially the increased childhood  
49 vaccination coverage between 1980 and 2000 [1,4], the presence of mutations in the virus  
50 associated with selective pressure for vaccination and treatment, often makes it difficult to control  
51 this infection [2]. Furthermore, the poor availability of prevention programs, and the existence of  
52 individuals that do not respond adequately to the vaccine, means that almost 257 million people  
53 born before the modern vaccination regimes have an increased risk of infection. This situation is  
54 of even greater concern when considering the 2017 WHO global report that most infected people  
55 lack access to diagnosis, which means that there are millions of infected people at risk of  
56 developing chronic hepatitis, cancer and death, as well as being potential sources of the infection  
57 [1].

58 Given the problem of access to HBV diagnosis in some regions, blood banks represent a key  
59 element for the detection of infected people and for access to treatment. In order to assure high

60 quality results, the application of technology with high diagnostic validity is required to avoid  
61 unnecessary deferral by false positives and the inherent risk in false negatives, especially those  
62 donors with chronic HBV infections and low viremia levels [4,6,8,9].

63 In this sense, detection of antigens and antibodies individually or in combination, is of great benefit  
64 for the timely diagnosis of HBV. The detection of the hepatitis B surface antigen (HBsAg) is the  
65 most common assay used by bloodbanks to check the infection; it appears earliest and can remain  
66 detectable for life [3, 9]. Also used is detection of antibodies against the hepatitis B core antigen  
67 (anti-HBc) that appears during the acute infection and signify a new infection [3,9].

68 Some previous studies have documented a high heterogeneity in the validity data of HBV screening  
69 tests. For example, Farooq *et al.*, in 2017 compared three routinely diagnostic tests for HBsAg (SD  
70 Bioline rapid assay, GB HBsAg ELISA and Abbott ARCHITECT<sup>®</sup>CLIA system) with a  
71 quantitative determination of hepatitis B surface antigen (HBsAg) (LIAISON<sup>®</sup> XL Murex HBsAg  
72 Quant assay - chemiluminescence immunoassay), in which they found sensitivities of 17.2%,  
73 43.7%, 90.9% and 100% respectively, and positive probability ratios between 38 and 100 [2]. In  
74 addition, Mutocheluh *et al.* in 2014 evaluated the performance of the most common  
75 immunochromatographic (ICT) kits (Wondfo, Rapid Care, Core TM, Accul-Tell and Abon) used  
76 for screening blood donors in some blood bank facilities in the northern part of Ghana. The reported  
77 sensitivities for the HBsAg rapid tests in this study were, Wondfo 59.1% Rapid Care and Accul-  
78 Tell 54.5%, and Core TM and Abon 50% [10]. On the other hand, Randrianirina *et al.*, in 2008 and  
79 Dogbe *et al.*, in 2015 reported overall sensitivities for rapid tests between 93.8% and 100%; with  
80 specificity values between 95.6% and 100% [4,6].

81 Those results presented above demonstrate a high diversity of diagnostic validity which underpins  
82 the need to meta-analyze the evidence available on this topic. In this sense, it should be considered

83 that systematic reviews have advantages over the evidence of individual studies, by improving the  
84 external validity of the results, the quality of clinical and epidemiological recommendations, and  
85 the accuracy of the estimates. Therefore, it permits the generation of results from an exhaustive  
86 search of the literature containing studies of the same kind and with a common goal, allowing a  
87 combination of findings, while reducing biases and random errors of the reviewed literature.  
88 Particularly in diagnostic tests, systematic reviews allow for a more complete assessment by  
89 estimating parameters such as sensitivity, specificity, likelihood ratios (LR) , diagnostic odds ratio  
90 (OR) and a receiver operating characteristic (ROC) curve [11-13]. Therefore, the objective of this  
91 research was to evaluate the validity of HBV immunodiagnosis, focusing on HBsAg, based on  
92 studies published in the scientific literature worldwide between 2000 and 2018.

## 93 **Materials and methods**

### 94 **Study search and selection protocol**

95 A systematic review of the literature with a meta-analysis of diagnostic tests was carried out  
96 following the recommendations of the Cochrane Collaboration and the four phases of the preferred  
97 reporting items for systematic reviews and meta-analyses (PRISMA) guide as described [14].

### 98 **Identification**

99 Specific search, circumscribed to language controlled in terms of thesaurus, particularly  
100 multilingual and structured vocabulary DeCS - Health Sciences Descriptors and MeSH - Medical  
101 Subject Headings, was performed for original articles published in PubMed, Scielo and Science  
102 Direct, which was supplemented by a sensitivity search on Google Scholar. Eight search terms  
103 were used for diagnostic evaluation parameters (false positives, false negatives, negative predictive  
104 value, positive predictive value, true negative, true positive, sensitivity and specificity), two

105 synonyms for blood banks and blood banking, and two for blood donations. Each diagnostic  
106 parameter was combined with the four terms of the blood bank obtaining a total of 32 different  
107 search strategies (Supplementary Material 1). Some syntaxes used were: in PubMed  
108 *((Sensitivity[Title/Abstract]) AND Specificity[Title/Abstract]) AND Blood Donor[Title/Abstract]*  
109 *OR ((Sensitivity[Title/Abstract]) AND Specificity[Title/Abstract]) AND Blood*  
110 *Banks[Title/Abstract]*, in Science Direct: Title, abstract, keywords: Positive Predictive Value AND  
111 Blood Donation, in Scielo: ti:(ab:(Negative Predictive Value AND Blood Donation)))and in  
112 Google scholar (*allintitle: False Positives and Blood Donation*) (Supporting information 1. Search  
113 strategies applied).

## 114 **Screening**

115 Duplicate studies were eliminated, and two inclusion criteria were applied: original studies and  
116 blood donor research.

## 117 **Eligibility**

118 Studies were excluded that did not include HBV, or were not available in databases, or that failed  
119 to receive any response from the author. In addition, manuscripts with incomplete information  
120 (incomplete data on the variables to be analyzed in this review), or articles in which the tests would  
121 not be evaluated or did not have reports of sensitivity, specificity, positive or negative predictive  
122 values were all excluded from this study.

123 **Inclusion:** Those articles that fulfilled the previous criteria, were evaluated for methodological  
124 quality and extraction of variables. It includes title, lead author, publication year, place of study,  
125 population, type of diagnostic test analyzed, true positives (HBV-infected donors and positive  
126 screening result) and true negatives (donors without HBV with negative screening result), false

127 positives (donors without HBV and positive screening result), and false negatives (donors with  
128 HBV with negative screening result).

129

## 130 **Reproducibility and quality assessment**

131 To ensure reproducibility of the search and in the selection of studies, the search was carried out  
132 by two reviewers. It was determined *a priori* that the differences would be resolved by consensus.

133 To ensure the reproducibility of the extraction of variables, two reviewers performed independently  
134 the search and the kappa index was applied for qualitative variables and intra-class correlation  
135 coefficient for quantitative variables. To assess the methodological quality of the studies included,  
136 the criteria of the Quality Assessment of Diagnostic Accuracy Studies (QUADAS) guide were  
137 applied [15].

## 138 **Analysis plan**

139 The studies were described with absolute and relative frequencies. Sensitivity, specificity, positive  
140 and negative LR, diagnostic OR and ROC curve with their 95% confidence intervals were  
141 estimated. The analyses were performed with a random effects meta-analysis in *MetaDis* (*Meta*  
142 *analysis of studies of evaluations of Diagnostic and Screening tests*) with a significance of 0.05  
143 and REM model. The combined measurements of the studies are based on the  $Q(X^2)$  Der Simonian-  
144 Laird Test. 95% confidence intervals were corrected with an over-dispersion estimate. The  
145 heterogeneity analysis is based on Cochrane's Q statistic and the uncertainty (sensitivity) statistic  
146 on the weight percentage of each individual study on the overall result.

## 147 **Results**

148 4,601 studies were sifted with the search terms in title or abstract. From those only 12 complied  
 149 with the search and selection protocol (Figure 1). Those studies were published between 2006 and  
 150 2017, most were conducted in African and Asian countries, in a total population of 18,620 subjects  
 151 of which 17,391 were healthy and 1,229 were infected (Table 1).

152 **Figure 1. Flowchart of search and research selection.**

153 **Table 1. Description of the studies included in this review**

| Author                           | Country       | Healthy | Infected | Standard                                                                                                           | Evaluated Test                                                                                                         |
|----------------------------------|---------------|---------|----------|--------------------------------------------------------------------------------------------------------------------|------------------------------------------------------------------------------------------------------------------------|
| Schmidt, 2006 [9]                | Germany       | 9822    | 161      | PCR (ID-NAT, HBV<br>Cobas AmpliScreen –<br>Roche molecular<br>Systems)                                             | PRISM HBcore y PRISM<br>HBc                                                                                            |
| Louisirootchanakul,<br>2006 [16] | Thailand      | 107     | 105      | Elecsys HBsAg<br>Cobas - AxSYM<br>HBsAg Abbott                                                                     | VIDAS HBsAG (Ultra),<br>Hepanostika HBsAg,<br>MONOLISA HBsAg (Ultra),<br>Vitros HBsAg, Enzygnost<br>HBsAg, Ortho HBsAg |
| Randrianirina, 2008 [4]          | Madagascar    | 109     | 91       | AxSYM HBsAg<br>Abbott, Vidas Anti-<br>HBs total and HBsAg<br>Ultra Confirmation<br>tests (both from<br>bioMérieux) | Determine HBsAg, Virucheck,<br>Hexagon HBsAg, Cypress<br>HBsAg, Dipstick                                               |
| Liu, 2010 [17]                   | United States | 631     | 19       | Ortho HBsAg<br>(ELISA)                                                                                             | ELISA city blood, country<br>blood A, country blood B                                                                  |



|                              |          |      |     |                                                                                                       |                                                                                      |
|------------------------------|----------|------|-----|-------------------------------------------------------------------------------------------------------|--------------------------------------------------------------------------------------|
| <b>Jeremiah, 2011 [18]</b>   | Nigeria  | 243  | 23  | Clinotech diagnostic<br>enzyme linked<br>immunosorbent assay<br>(ELISA)                               | Clinotech Diagnostics                                                                |
| <b>Kilale, 2012 [19]</b>     | Tanzania | 99   | 287 | AxSYM HBsAg<br>Abbott                                                                                 | Hep-cell test kit                                                                    |
| <b>Maity, 2012 [7]</b>       | India    | 60   | 40  | HBsAg MONOLISA<br>(Bio-Rad)                                                                           | ELISA Quick Kit J Mitra,<br>SPAN Diagno, ELISA Quick<br>Diagno Kit, Transa           |
| <b>El-Ghitany, 2013 [3]</b>  | Egypt    | 811  | 205 | ELISA (Dialab)                                                                                        | HBs-Ab RDT y HBc-Ab RDT                                                              |
| <b>Mutocheluh, 2014 [10]</b> | Ghana    | 140  | 24  | ELISA kit (Human<br>Gesellschaft,<br>Biochemica and<br>Diagnostics,<br>Germany)                       | Wondfo, Accul-Tell, Care<br>Rapid, Core Tm, Abon                                     |
| <b>Dogbe, 2015 [6]</b>       | Ghana    | 267  | 33  | ELISA<br>(immunoabsorption<br>assay linked to<br>double sandwich<br>enzyme)- Innovation<br>Biotech Co | ELISA, Agogo, Bekwai,<br>KATH, KNUST, Sunyani                                        |
| <b>Ha, 2017 [5]</b>          | Korea    | 721  | 122 | Nested-PCR within<br>$10^0$ – $10^1$ copies/mL                                                        | Cobas MPX                                                                            |
| <b>Farooq, 2017 [2]</b>      | Pakistan | 4381 | 119 | AccuPower® HBV<br>Quantitative PCR Kit                                                                | LIAISON XL Murex HBsAg<br>Quantitative testing, Abbott<br>Architect-CLIA, SD Bioline |

---

rapid assay, GB HBsAg

ELISA

---

154  
155 Only two studies evaluated the diagnostic validity of detecting anti-HBc [3,9] and only one study  
156 evaluated both HBsAg and anti-HBc detections simultaneously [3]. The other studies evaluated  
157 immunological tests for the detection of HbsAg, using as standard a third-generation ELISA test,  
158 and only three studies did the index test with a PCR assay [2,5,9]. All studies presented high  
159 methodological quality by meeting more than 90% of the criteria of the QUADAS guide, the least  
160 applied were those related to the use of thresholds report of indeterminate results and, the  
161 appropriate time between the application of the test and the standard, which were applied in 92%  
162 of studies.

163 Based on eight studies evaluating ELISA for HBsAg detection compared with the combination of  
164 other immunodiagnostic tests, 28 subgroups were analyzed in 680 HBV-infected and 1840 healthy  
165 donors. It is important to clarify that in Jeremiah et al.'s study, they used ELISA as a standard test  
166 to detect anti-HBc-IgM antibodies; however, due to the lack of an adequate comparison group this  
167 study was not included in this meta-analysis [18]. Similarly, Farooq et al. and Ha et al. used PCRs  
168 as standard and were omitted from meta-analysis due to a lack of a standard comparable to other  
169 studies [2,5]. The studies of Schmidt et al. and El-Ghitany et al. could not be analyzed because they  
170 only evaluated HBc, with sensitivity results ranging from 85.5% to 99.4%, and specificity results  
171 between 98.4% and 99.9% [3,9].

172 Overall sensitivity of HBsAg was 94.1% (95% CI= 92.9% - 95.1%), ranging from 50.0% (95% CI  
173 = 29.1% - 70.9%) and 100.0% (95% CI = 96.5% - 100.0%); while overall specificity was 98.2%  
174 (95% CI = 97.8% - 98.6%) with a range between 86.9% (95% CI = 79.0% - 92.7%) and 100.0%

175 (95% CI = 96.6% - 100.0%). No study or subgroup had statistically greater weight on the overall  
176 measure, demonstrating the relevance of the value estimate of these parameters in a combined way.  
177 Both the  $I^2$  (>50%) and the Chi-square test ( $p < 0.05$ ) showed the heterogeneity in the studies for the  
178 parameters of sensitivity and specificity; this evidenced the need to estimate the combined measure  
179 through random effects (considering intra and inter studies variation) (Figure 2).

180 **Figure 2. Sensitivity and specificity of the immunological diagnosis with HBsAg.** (A)  
181 correspond to sensitivity analysis and (B) to specificity analysis with confidence intervals (CI) of  
182 95%.

183 The authors of studies with the lowest sensitivity indicated that these results are attributed to the  
184 deficiency of the tests to detect genotypes and subtypes other than HBV in diverse populations,  
185 and also due to technical problems including: lack of quality assurance, poor training, and  
186 recertification of laboratory staff in rural areas, problems transporting and storing samples in  
187 resource-deficit remote areas, the absence of controls and a lack of evaluation of commercial kits  
188 [3,10,17].

189 The overall positive LR was 53.06(95% CI = 32.38 - 86.96) with a range between 7.4 (95% CI =  
190 4.6 - 12.0) and 2633.8 (95% CI = 164.4 - 42186.3), and the overall negative LR was 0.05 (95% CI  
191 = 0.023-0.092), ranging from 0.005 (95% CI = 0.000-0.075) to 0.507 (95% CI = 0.340-0.757),  
192 with no study with greater statistic weight on the combined measurement. In these parameters the  
193  $I^2$  (>50%) and Cochran-Q test ( $p < 0.05$ ) showed the heterogeneity in the studies (Figure 3).

194 **Figure 3. HBsAg likelihood ratios.** (A) correspond to positive LR and (B) correspond to negative  
195 LR both with CI of 95%

196 The global diagnostic OR was 1720.9 (95% CI = 607.18 - 4418.8), with a range of 34.7 (95% CI =  
197 18.4 - 65.2) to 45365.0 (95% CI = 891.91 - 2307390), and an area under curve of 99.72%; with a

198 sensitivity analysis that demonstrated the robustness of the combined measurement. Also high  
199 heterogeneity was found according to  $I^2$  and Cochran-Q (Figure 4).

200 **Figure 4. Odds ratio diagnostic and area under curve for HBsAg detection.** (A) Corresponds  
201 to ORD and (B) to the Summary Receiver Operating Curve (SROC).

202

## 203 **Discussion**

204 This review included 12 studies with high methodological quality in which different diagnostic  
205 tests were applied for the detection of HBV in 18,620 individuals and HBsAg meta-analysis in  
206 2,520 participants. The results confirmed the advantages offered by the meta-analysis of diagnostic  
207 tests, allowing extrapolation of their results, greater accuracy, high quality evidence and diagnostic  
208 performance. These parameters can be used to improve clinical and epidemiological decision-  
209 making [13,20].

210 The continents with the most research on this topic were Africa and Asia, and in contrast, America  
211 and Europe had an inadequate report of diagnostic test evaluations for HBV, which relates to some  
212 epidemiological data. For example, the latest World Health Organization (WHO) report for 2019,  
213 indicates that the West Pacific (Asian) and African regions had higher HBV infection prevalence  
214 (around 6%), while the Eastern Mediterranean, South-East Asia, Europe and the Americas were  
215 lower with a 3.3%, 2.0%, 1.6% and 0.7% respectively [21].

216 The combination of the studies included in this analysis, allowed us to calculate an overall measure  
217 for sensitivity and specificity of 94% and 98% respectively, indicating that there are few false  
218 negative and positive results in those immunological tests for the detection of HbsAg. In addition,  
219 PLR of 53 and NLR of 0.05, confirm that the gain of sensitivity and specificity in the overall

220 measurement of the evaluated tests, is not due to false positive or negative results. The high Odd  
221 Radio Diagnostic ORD reflects HBsAg's excellent ability to differentiate truly healthy from  
222 infected individuals, as HBV-infected donors are 1,721 times more likely to generate a positive  
223 result, compared to healthy donors (the odds of a false positive are extremely low). Likewise, the  
224 ROC curve showed an excellent relationship between sensitivity and specificity with a value of  
225 0.9972; being a statistical parameter that allows different studies to be grouped under the same  
226 curve, and confirming that there is a high diagnostic performance in the detection of HBsAg [22].  
227 Only two studies evaluated Anti-HBc, indicating that the use of immunological tests for the  
228 detection of HBsAg, remain the most widely used in the screening of blood donors. The HBsAg is  
229 the first serological marker that appears after infection with this virus and can even be detected  
230 during the incubation period, and its persistence for a period longer than six months allows one to  
231 classify the infection as chronic [19]. However, authors such as Schmidt et al. and Jeremiah et al.  
232 indicate that detection of anti-HBc should be considered as a potential measure to increase the safety  
233 of the blood to be transfused, since HBsAg detection does not rule out the risk of HBV transmission  
234 during the immune window period. In addition, the anti-HBc appears first during the acute period,  
235 reflecting recent infection, and making it an excellent marker of hidden HBV infection. Also, anti-  
236 HBc detection has lower cost compared to PCR, and may be useful in people who conceal risky  
237 behaviors in pre-donation surveys [9,18,23].  
238 Finally, these findings account for the validity and safety of HBsAg detection for screening of  
239 blood banks, and its potential utility in clinical contexts. This is consistent with the WHO Report  
240 on Hepatitis B for 2019, which reiterates its recommendation to test all blood units with this marker  
241 in order to detect infection, ensure blood safety, prevent HBV transmission, and improve access to  
242 treatment for the infected donors. These findings are of greater importance when considering that

243 in 2016, WHO estimated about 27 million people infected and only 16.7% of the diagnosed  
244 population has access to treatment, principally due to the large limitations they have to access  
245 diagnosis. The lack of timely diagnosis increases the risk of transmission of the infection and thus  
246 the possibility of developing cirrhosis or hepatocellular carcinoma which by 2015 caused 887,000  
247 deaths [21].

248 Among the main limitations of this meta-analysis is the lack of demographic and clinical-  
249 epidemiological data of the participants of each study to analyze possible sources of heterogeneity  
250 in the parameters analyzed and perform analyses of Subgroups.

## 251 **Conclusion**

252 With a large sample size, for both healthy and infected donors and studies of high methodological  
253 quality, it is confirmed that the detection of HBsAg has excellent validity which supports its use in  
254 clinical screening, blood banks and population-surveillance programs.

## 255 **Supporting information**

256 S1. Search strategies applied to databases.

## 257 **Acknowledgments**

258 None apply.

## 259 **Author Contributions**

260 Conceptualization: JACA.

261 Data curation: CPOM, JACA.

262 Funding acquisition: JCZ.

263 Investigation: CPOM, JACA, SMM, JCZ.

264 Methodology: CPOM, JACA.

265 Software: CPOM, JACA.

266 Supervision: JACA, JCZ.

267 Validation: CPOM, JACA, SMM, JCZ.

268 Writing – original draft: CPOM, JACA, SMM, JCZ

269 Writing – review & editing: CPOM, JACA, SMM, JCZ.

## 270 **Funding**

271 This research received no external funding.

## 272 **Conflicts of Interest**

273 None of the authors declare conflict of interest for the publication of this manuscript.

274

## 275 **References**

- 276 1. World Health Organization. New hepatitis data highlight need for urgent global response.  
277 2017. [Cited 2014 March 17]. Available: [https://www.afro.who.int/news/new-hepatitis-  
278 data-highlight-need-urgent-global-response](https://www.afro.who.int/news/new-hepatitis-<br/>278 data-highlight-need-urgent-global-response).
- 279 2. Farooq A, Waheed U, Zaheer HA, Aldakheel F, Alduraywish S, Arshad M. Detection of  
280 hbsag mutants in the blood donor population of pakistan. *PLoS One*.  
281 2017;12(11):e0188066. doi:10.1371/journal.pone.0188066.
- 282 3. El-Ghitany EM, Farghaly AG. Evaluation of commercialized rapid diagnostic testing for  
283 some hepatitis b biomarkers in an area of intermediate endemicity. *J Virol Methods*.  
284 2013;194(1-2):190-3. doi: 10.1016/j.jviromet.2013.08.026
- 285 4. Randrianirina F, Carod JF, Ratsima E, Chretien JB, Richard V, Talarmin A. Evaluation of  
286 the performance of four rapid tests for detection of hepatitis b surface antigen in

- 287 antananarivo, madagascar. *J Virol Methods*. 2008;151(2):294-7. doi:  
288 10.1016/j.jviromet.2008.03.019.
- 289 5. Ha J, Park Y, Kim HS. Evaluation of clinical sensitivity and specificity of hepatitis b virus  
290 (hbv), hepatitis c virus, and human immunodeficiency virus-1 by cobas mpX: Detection of  
291 occult hbv infection in an hbv-endemic area. *J Clin Virol*. 2017;96:60-3. doi:  
292 10.1016/j.jcv.2017.09.010.
- 293 6. Dogbe EE, Arthur F. Diagnostic accuracy of blood centers in the screening of blood donors  
294 for viral markers. *Pan Afr Med J*. 2015;20:119. doi: 10.11604/pamj.2015.20.119.5263.
- 295 7. Maity S, Nandi S, Biswas S, Sadhukhan SK, Saha MK. Performance and diagnostic  
296 usefulness of commercially available enzyme linked immunosorbent assay and rapid kits  
297 for detection of hiv, hbv and hcv in india. *Virol J*. 2012;9:290. doi: 10.1186/1743-422X-9-  
298 290.
- 299 8. Bedoya JA, Cortes Marquez M, Cardona-Arias JA. Seroprevalence of markers of  
300 transfusion transmissible infections in blood bank in colombia. *Rev Saude Publica*.  
301 2012;46(6):950-9.
- 302 9. Schmidt M, Nubling C, Scheiblaue H, Chudy M, Walch LA, Seifried E, et al. Anti-hbc  
303 screening of blood donors: A comparison of nine anti-hbc tests. *Vox Sang*. 2006;91(3): 237-  
304 43.
- 305 10. Mutocheluh M, Owusu M, Kwofie TB, Akadigo T, Appau, E, Narkwa PW. Risk factors  
306 associated with hepatitis b exposure and the reliability of five rapid kits commonly used for  
307 screening blood donors in ghana. *BMC Res Notes*. 2014;7:873. doi: 10.1186/1756-0500-7-  
308 873.



- 309 11. Molina M. El metaanálisis de pruebas diagnósticas. *Rev Pediatr Aten Primaria*, 2015;17(6):  
310 281-5.
- 311 12. Zamora J, Abaira V, Muriel A, Khan K, Coomarasamy. A. Meta-disc: A software for meta-  
312 analysis of test accuracy data. *BMC Med Res Methodol*. 2006;6(31). doi:10.1186/1471-  
313 2288-6-31.
- 314 13. Cardona-Arias J, Ríos L, Higueta-Gutierrez L. Revisiones sistemáticas de la literatura.  
315 Bogotá: Univerisdad Cooperativa de Colombia; 2019.  
316 DOI: <http://dx.doi.org/10.16925/9789587600377>.
- 317 14. Moher D, Liberati A, Tetzlaff J, Altman DG, Group PRISMA. Preferred reporting items  
318 for systematic reviews and meta-analyses: The prisma statement. *Open Med*. 200;6(7):  
319 e1000097. doi: 10.1371/journal.pmed.1000097.
- 320 15. Whiting PF, Rutjes AW, Westwood ME, Mallett S, Deeks JJ, Reitsma JB, et al. Quadas-2:  
321 A revised tool for the quality assessment of diagnostic accuracy studies. *Ann Intern Med*.  
322 2011;155(8):529-36. doi: 10.7326/0003-4819-155-8-201110180-00009.
- 323 16. Louisirirochanakul S, Kanoksinsombat C, O'Charoen R, Fongsatikul L, Puapairoj C,  
324 Lulitanond V, et al. Hbsag diagnostic kits in the detection of hepatitis b virus mutation  
325 within "a" determinant. *Viral Immunol*. 2006;19(1):108-114.
- 326 17. Liu S, Figueroa P, Rou K, Wu Z, Chen X, Detels R. Safety of the blood supply in a rural  
327 area of china. *J Acquir Immune Defic Syndr*. 2010;53(Suppl 1):S23-26.  
328 doi: 10.1097/QAI.0b013e3181c7d494.
- 329 18. Jeremiah ZA, Idris H, Ajayi BB, Ezimah AC, Malah MB, Baba MM. Isolated anti-hbc-igm  
330 antibody among blood donors in the semi-arid region of nigeria. *Hum Antibodies*.  
331 2011;20(3-4):77-82. doi: 10.3233/HAB-2011-0242.

- 332 19. Kilale AM, Range NS, Ngowi PH, Kahwa AM, Mfinanga SG. Evaluation of the kemri hep-  
333 cell ii test kit for detection of hepatitis b surface antigens in tanzania. *Tanzan J Health Res.*  
334 2012;14(3):189-193.
- 335 20. Beltran O. Revisiones sistemáticas de la literatura. *Rev Col Gastroenterol.* 2005;20(1):60-  
336 9.
- 337 21. World Health Organization. Hepatitis B. 2019. [Cited 2014 March 17]. Available:  
338 <https://www.who.int/news-room/fact-sheets/detail/hepatitis-b>
- 339 22. Torres D, Sierra F, Beltran O. Cuando la evidencia evalúa pruebas diagnósticas... ¿qué  
340 debemos saber, qué debemos hacer? *Rev Col Gastroenterol*, 2004;19(4):281-285.
- 341 23. Kumar H, Gupta PK, Jaiprakash M. The role of anti-hbc igm in screening of blood donors.  
342 *Med J Armed Forces India.* 2007;63(4):350-2. doi: 10.1016/S0377-1237(07)80013-X.

bioRxiv preprint doi: <https://doi.org/10.1101/2020.04.17.046458>; this version posted April 17, 2020. The copyright holder for this preprint (which was not certified by peer review) is the author/funder, who has granted bioRxiv a license to display the preprint in perpetuity. It is made available under aCC-BY 4.0 International license.

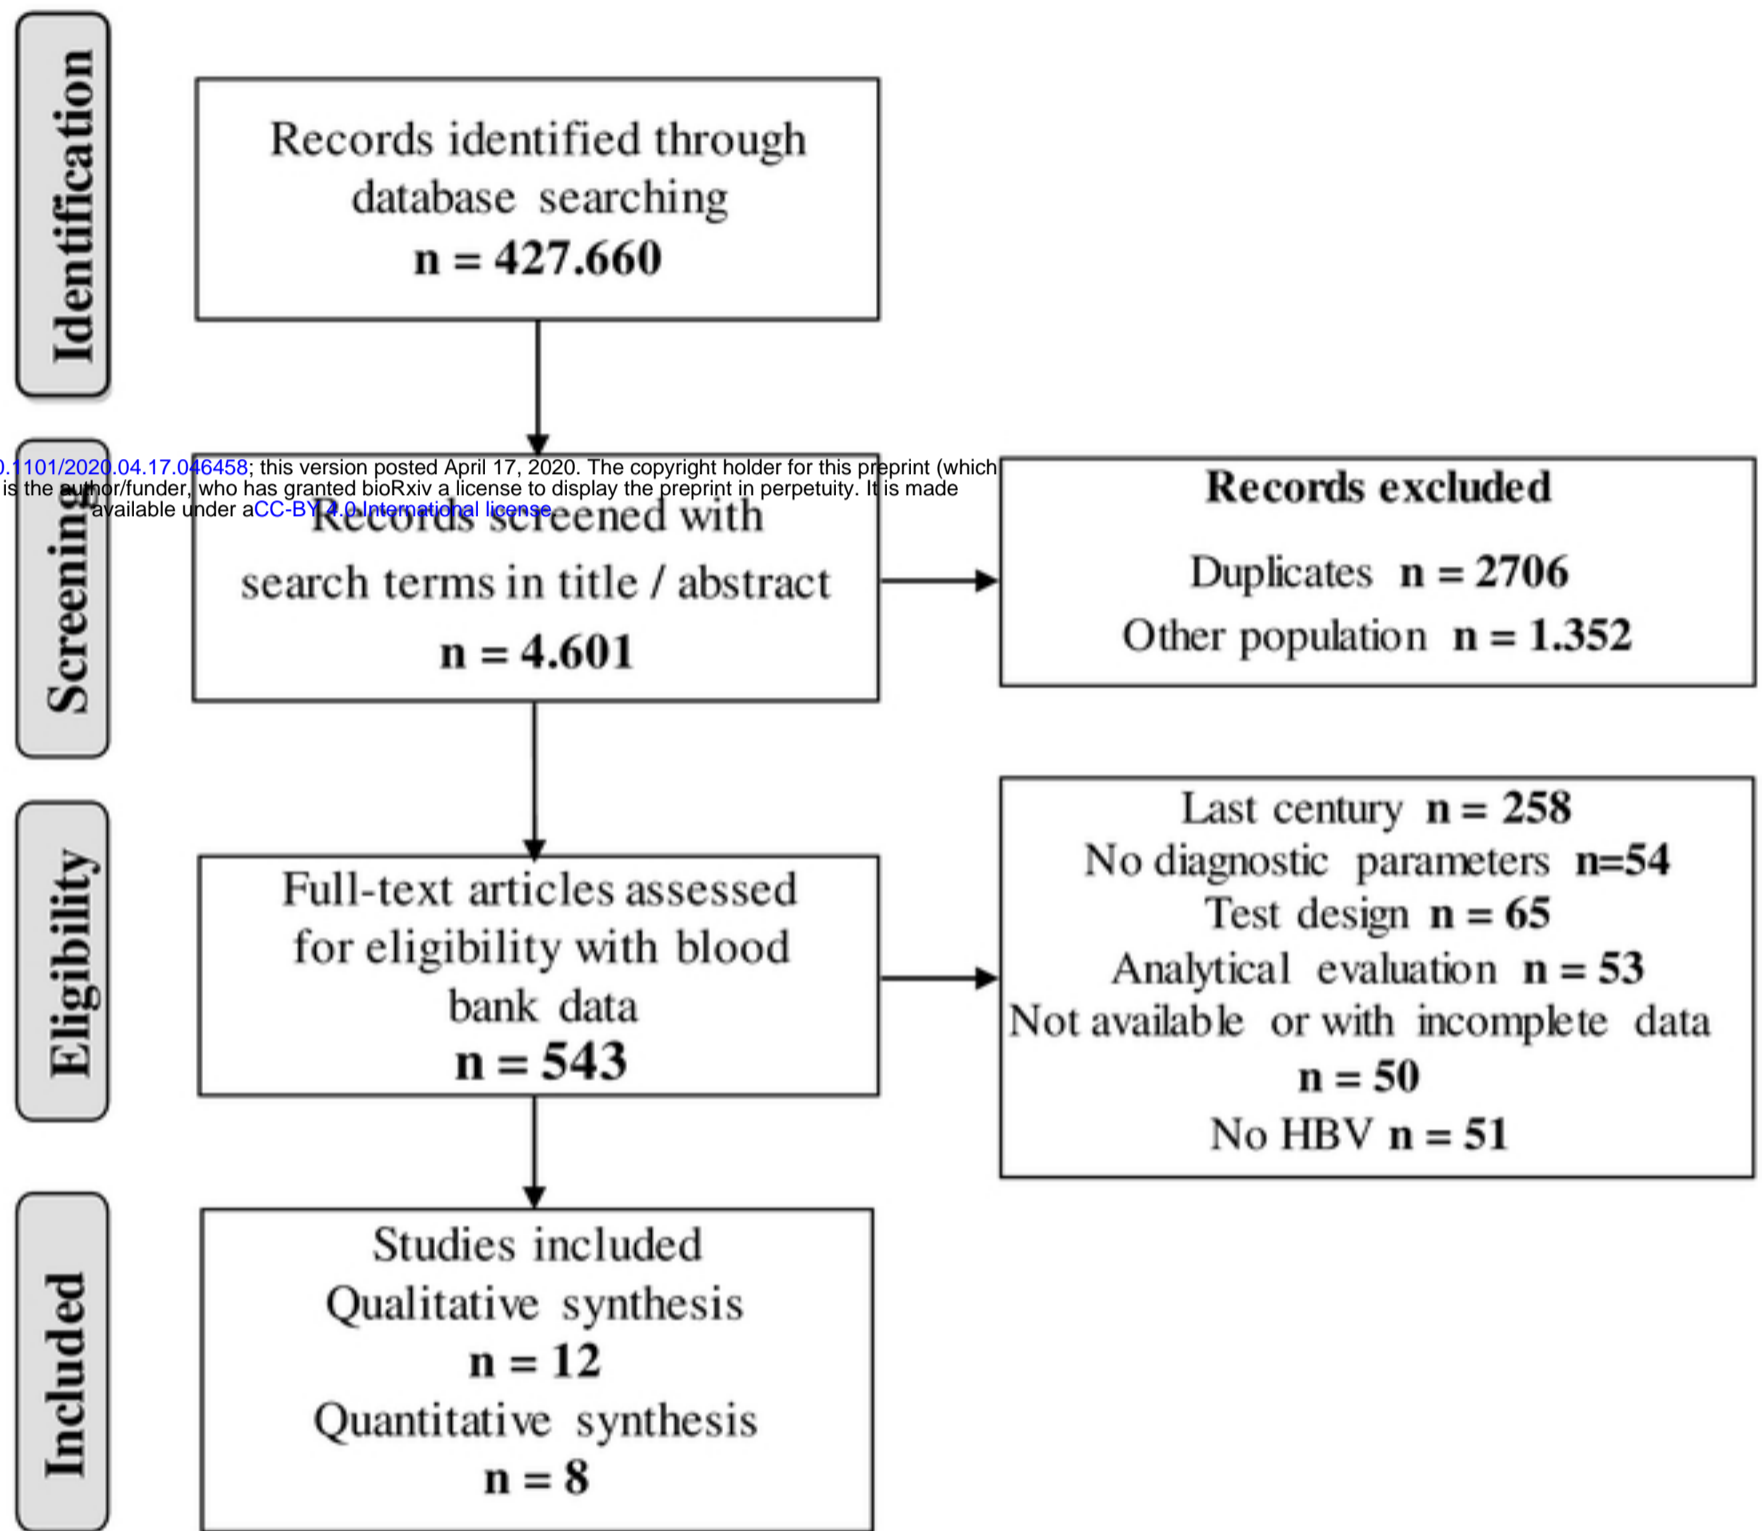

Figure 1
